# Supplementary material for: Bibliometric Analysis of Literature in Snake Venom-Related Research Worldwide (1933–2022)
Source: MDPI journal article supplement (doi:10.3390/ani12162058), 2022-08-12
Supplement: s1 [file s1]

**Table S1.** Snake venom components as novel drug candidates to eliminate drug resistant bacteria.

| No. | Bacteria strains                                                      | Toxins or enzymes                            | Snake                                                                  | References |
|-----|-----------------------------------------------------------------------|----------------------------------------------|------------------------------------------------------------------------|------------|
| 1   | MRSA, MDR <i>Escherichia coli</i> , MDR <i>Pseudomonas aeruginosa</i> | OH-CATH30 and OH-CM6 (cathelicidins)         | <i>Ophiophagus hannah</i>                                              | [37]       |
| 2   | MRSA and VRSA                                                         | CATHPb1 (cathelicidin)                       | <i>Python bivittatus</i>                                               | [38]       |
| 3   | MDR <i>Acinetobacter baumannii</i> and MRSA                           | OH-CATH30 (cathelicidins)                    | <i>Ophiophagus hannah</i>                                              | [39]       |
| 4   | MRSA                                                                  | Cath-A (cathelicidin)                        | <i>Bungarus fasciatus</i>                                              | [40]       |
| 5   | MDR <i>Burkholderia pseudomallei</i>                                  | Crotoxin B and daboitoxin (phospholipase A2) | <i>Crotalus durissus terrificus</i> , <i>Daboia russelli siamensis</i> | [41]       |
| 6   | MDR <i>B. pseudomallei</i>                                            | metalloproteinase                            | <i>Agkistrodon halys</i>                                               | [42]       |
| 7   | MDR <i>B. pseudomallei</i>                                            | VipTx-II (phospholipase A2)                  | <i>Daboia russelli russelli</i>                                        | [43]       |
| 8   | MDR <i>Mycobacterium tuberculosis</i>                                 | vpg-1 peptide                                | <i>Naja atra</i>                                                       | [44]       |
| 9   | MRSA                                                                  | pC-CoaTxII phospholipase A2                  | <i>Crotalus oreganus abyssus</i>                                       | [45]       |

MRSA: methicillin-resistant *Staphylococcus aureus*; VRSA: vancomycin-resistant *Staphylococcus aureus*; MDR: multi-drug-resistant.

**Table S2.** Anticancer properties of snake venom and its components.

| No.                           | Cell lines                                   | Toxins or enzymes             | Snake                                    | References |
|-------------------------------|----------------------------------------------|-------------------------------|------------------------------------------|------------|
| <b>Metastasis inhibition</b>  |                                              |                               |                                          |            |
| 1                             | human melanoma M24met                        | contortrostatin (disintegrin) | <i>Agkistrodon contortrix contortrix</i> | [46]       |
| 2                             | human breast cancer MDA-MB-435               | contortrostatin (disintegrin) | <i>Agkistrodon contortrix contortrix</i> | [47]       |
| 3                             | human glioblastoma T98G, U87, A172, and U138 | contortrostatin (disintegrin) | <i>Agkistrodon contortrix contortrix</i> | [48]       |
| 4                             | human hepato-carcinoma HepG2 and SMMC-7721   | agkhipin (arginine esterase)  | <i>Gloydius halys Pallas</i>             | [49]       |
| 5                             | human gingival carcinoma Ca9-22              | cardiotoxin III               | <i>Naja naja atra</i>                    | [50]       |
| 6                             | human breast cancer MDA-MB-231               | Vaa-Dis (disintegrin)         | <i>Vipera ammodytes ammodytes</i>        | [51]       |
| <b>Induction of apoptosis</b> |                                              |                               |                                          |            |
| 7                             | human gastric cancer MKN-45, colorectal      | l-amino acid oxidases (LAAO)  | <i>Bothrops leucurus</i>                 | [52]       |

| No. | Cell lines                                                 | Toxins or enzymes       | Snake                                                                                            | References |
|-----|------------------------------------------------------------|-------------------------|--------------------------------------------------------------------------------------------------|------------|
|     | cancer HUTU, colon carcinoma RKO                           |                         |                                                                                                  |            |
| 8   | human ovarian cancer CAOV3 and OVCAR3                      | LAAO                    | <i>Crotalus adamanteus</i>                                                                       | [1]        |
| 9   | human colorectal cancer LoVo, HTC-116, and HT-29           | SVT                     | <i>Echis coloratus</i>                                                                           | [54]       |
| 10  | human leukemia HL60, JURKAT, murine melanoma B16F10        | LAAO                    | <i>Bothrops atrox</i>                                                                            | [55]       |
| 11  | human prostate cancer PC-3 and DU145                       | SVT                     | <i>Vipera lebetina turanica</i>                                                                  | [56]       |
| 12  | human breast cancer MCF-7                                  | rusvinoxidase (LAAO)    | <i>Daboia russelii russelii</i>                                                                  | [57]       |
| 13  | human colon adenocarcinoma HCT116 and HT-29                | SVT                     | <i>Vipera lebetina turanica</i>                                                                  | [58]       |
| 14  | human teratocarcinoma PA-1 and human ovarian cancer SK-OV3 | SVT                     | <i>Vipera lebetina turanica</i>                                                                  | [59]       |
| 15  | human neuroblastoma SK-N-MC and SK-N-SH                    | SVT                     | <i>Vipera lebetina turanica</i>                                                                  | [60]       |
| 16  | human lung cancer A549                                     | ACTX-6 (cytotoxin)      | <i>Agkistrodon acutus</i>                                                                        | [61]       |
| 17  | colorectal adenocarcinoma LS174, HCT116, and HT-29         | lebein (disintegrin)    | <i>Macrovipera lebetina</i>                                                                      | [62]       |
| 18  | human leukemia HL-60 and hepatocellular carcinoma HepG2    | CR-LAAO                 | <i>Calloselasma rhodostoma</i>                                                                   | [63]       |
| 19  | HL-60 and HepG2                                            | BthTX-I (PLA2s)         | <i>Bothrops jararacussu</i>                                                                      | [64]       |
| 20  | HepG2, MCF-7, and DU145                                    | SVT                     | <i>Naja naja oxiana</i>                                                                          | [65]       |
| 21  | HCT-8, MDA-MB-231                                          | SVT                     | <i>Bitis arietans</i> , <i>C. gasperettii</i> , <i>E. coloratus</i> , and <i>Echis pyramidum</i> | [66]       |
| 22  | human endo-cervical carcinoma Ca Ski, C33A, A549, MCF-7    | SVT                     | <i>Vipera lebetina turanica</i>                                                                  | [67]       |
| 23  | human cervical cancer SiHa and HeLa                        | SVT                     | <i>Bothrops jararaca</i> and <i>Bothrops erythromelas</i>                                        | [68]       |
| 24  | MCF7                                                       | Phospholipase A2 (PLA2) | <i>Bungarus fasciatus</i>                                                                        | [69]       |
| 25  | HeLa                                                       | Pllans-II (PLA2)        | <i>Porthidium lansbergii lansbergii</i>                                                          | [70]       |
| 26  | human melanoma SK-MEL-28 and LU-1205                       | lebein (disintegrin)    | <i>Macrovipera lebetina</i>                                                                      | [71]       |
| 27  | MCF-7, SK-BR-3, and MDA-MB-231                             | BthTX-I (PLA2)          | <i>Bothrops jararacussu</i>                                                                      | [72]       |
| 28  | MCF-7                                                      | SVT                     | <i>Cerastes cerastes</i> and <i>Vipera lebetina</i>                                              | [73]       |

| No.                                  | Cell lines                                      | Toxins or enzymes                 | Snake                                         | References |
|--------------------------------------|-------------------------------------------------|-----------------------------------|-----------------------------------------------|------------|
| 29                                   | HCT-116, SW-480, and HT-29                      | LAAO                              | <i>Crotalus adamanteus</i>                    | [74]       |
| <b>Cell adhesion inhibition</b>      |                                                 |                                   |                                               |            |
| 30                                   | human fibrosarcoma HT1080, IGR39, HT29-D4, K562 | MVL-PLA2                          | <i>Macrovipera lebetina transmediterranea</i> | [75]       |
| 31                                   | human melanoma SK-Mel-28                        | colombistatin (disintegrin)       | <i>Bothrops colombiensis</i>                  | [76]       |
| 32                                   | human melanoma A-375 and A-549                  | tzabcanin (disintegrin)           | <i>Crotalus simus tzabcan</i>                 | [77]       |
| <i>Anti-proliferative activities</i> |                                                 |                                   |                                               |            |
| 33                                   | MCF-7 and A549                                  | LAAO                              | <i>Ophiophagus hannah</i>                     | [78]       |
| 34                                   | glioblastoma HCB151                             | L-amino acid oxidase (LAAOcdt)    | <i>Crotalus durissus terrificus</i>           | [79]       |
| 35                                   | ovarian carcinoma MDAH 2774                     | saxatilin (disintegrin)           | <i>Gloydius saxatilis</i>                     | [80]       |
| 36                                   | Hep2 and HeLa                                   | SVT                               | <i>Lapemis curtus</i>                         | [81]       |
| 37                                   | HeLa                                            | disintegrin                       | <i>Echis multisquamatis</i>                   | [82]       |
| 38                                   | HeLa and Hep2                                   | SVT                               | <i>Hydrophis spiralis</i>                     | [83]       |
| 39                                   | MCF-7 and MDA-MB-231                            | SVT                               | <i>Vipera raddei kurdistanica</i>             | [84]       |
| <b>Inhibition of angiogenesis</b>    |                                                 |                                   |                                               |            |
| 40                                   | lung cancer NCI-H460                            | saxatilin (disintegrin)           | <i>Gloydius saxatilis</i>                     | [85]       |
| 41                                   | HT-1080 and MDA-MB-231                          | vixapatin (C-type lectin-protein) | <i>Vipera xantina palestinae</i>              | [86]       |
| 42                                   | MDA-MB-231                                      | bothropoidin (metalloproteinase)  | <i>Bothrops pauloensis</i>                    | [87]       |

**Table S3.** Elapidae and Viperidae families as representatives of the well-characterized proteomics of snake venoms.

| No.             | Snake                             | References |
|-----------------|-----------------------------------|------------|
| <b>Elapidae</b> |                                   |            |
| 1               | <i>Aipysurus laevis</i>           | [135]      |
| 2               | <i>Austrelaps labialis</i>        | [136]      |
| 3               | <i>Bungarus caeruleus</i>         | [137]      |
| 4               | <i>Bungarus candidus</i>          | [138]      |
| 5               | <i>Bungarus fasciatus</i>         | [138,139]  |
| 6               | <i>Bungarus multicinctus</i>      | [139,140]  |
| 7               | <i>Dendroaspis angusticeps</i>    | [141]      |
| 8               | <i>Dendroaspis polylepis</i>      | [142]      |
| 9               | <i>Drysdalia coronoides</i>       | [143]      |
| 10              | <i>Hydrophis cyanocinctus</i>     | [144]      |
| 11              | <i>Hydrophis schistosus</i>       | [145]      |
| 12              | <i>Micrurus alleni</i>            | [146]      |
| 13              | <i>Micrurus altirostris</i>       | [147]      |
| 14              | <i>Micrurus fulvius</i>           | [148]      |
| 15              | <i>Micrurus mipartitus</i>        | [149]      |
| 16              | <i>Micrurus mosquitensis</i>      | [146]      |
| 17              | <i>Micrurus nigrocinctus</i>      | [150]      |
| 18              | <i>Micrurus tschudii tschudii</i> | [151]      |
| 19              | <i>Naja atra</i>                  | [140,152]  |
| 20              | <i>Naja haje</i>                  | [153]      |

| No.              | Snake                            | References |
|------------------|----------------------------------|------------|
| 21               | <i>Naja kaouthia</i>             | [154,155]  |
| 22               | <i>Naja katiensis</i>            | [156]      |
| 23               | <i>Naja melanoleuca</i>          | [157]      |
| 24               | <i>Naja mossambica</i>           | [156]      |
| 25               | <i>Naja naja</i>                 | [158,159]  |
| 26               | <i>Naja nigricollis</i>          | [156]      |
| 27               | <i>Naja nubiae</i>               | [156]      |
| 28               | <i>Naja pallida</i>              | [156]      |
| 29               | <i>Oxyuranus scutellatus</i>     | [160]      |
| 30               | <i>Pelamis platura</i>           | [161]      |
| 31               | <i>Pseudechis papuanus</i>       | [162]      |
| 32               | <i>Toxicocalamus longissimus</i> | [144]      |
| <b>Viperidae</b> |                                  |            |
| 33               | <i>Agkistrodon contortrix</i>    | [163,164]  |
| 34               | <i>Atropoides nummifer</i>       | [165]      |
| 35               | <i>Atropoides picadoi</i>        | [165]      |
| 35               | <i>Bitis caudalis</i>            | [166]      |
| 37               | <i>Bitis gabonica</i>            | [166]      |
| 38               | <i>Bitis nasicornis</i>          | [166]      |
| 39               | <i>Bothriechis aurifer</i>       | [168]      |
| 40               | <i>Bothriechis bicolor</i>       | [168]      |
| 41               | <i>Bothriechis lateralis</i>     | [168]      |
| 42               | <i>Bothriechis marchi</i>        | [168]      |
| 43               | <i>Bothriechis nigroviridis</i>  | [167]      |
| 44               | <i>Bothriechis schlegelii</i>    | [168]      |
| 45               | <i>Bothriechis thalassinus</i>   | [168]      |
| 46               | <i>Bothrocophias campbelli</i>   | [169]      |
| 47               | <i>Bothropoides pauloensis</i>   | [170]      |
| 48               | <i>Bothrops atrox</i>            | [171–175]  |
| 49               | <i>Bothrops ayerbei</i>          | [176]      |
| 50               | <i>Bothrops barnetti</i>         | [172]      |
| 51               | <i>Bothrops caribbaeus</i>       | [177]      |
| 52               | <i>Bothrops colombiensis</i>     | [178]      |
| 53               | <i>Bothrops cotiara</i>          | [179]      |
| 54               | <i>Bothrops diporus</i>          | [180]      |
| 55               | <i>Bothrops erythromelas</i>     | [181]      |
| 56               | <i>Bothrops fonsecai</i>         | [179]      |
| 57               | <i>Bothrops insularis</i>        | [182]      |
| 58               | <i>Bothrops jararaca</i>         | [174,183]  |
| 59               | <i>Bothrops lanceolatus</i>      | [177]      |
| 60               | <i>Bothrops neuwiedi</i>         | [174]      |
| 61               | <i>Bothrops pictus</i>           | [172]      |
| 62               | <i>Bothrops pirajai</i>          | [184]      |
| 63               | <i>Bothrops punctatus</i>        | [185]      |
| 64               | <i>Calloselasma rhodostoma</i>   | [186]      |
| 65               | <i>Cerastes cerastes</i>         | [187]      |
| 66               | <i>Cerrophidion godmani</i>      | [188]      |
| 67               | <i>Crotalus adamanteus</i>       | [189]      |
| 68               | <i>Crotalus atrox</i>            | [209]      |
| 69               | <i>Crotalus basiliscus</i>       | [190]      |
| 70               | <i>Crotalus durissus</i>         | [191,192]  |
| 71               | <i>Crotalus horridus</i>         | [193]      |

| No. | Snake                               | References |
|-----|-------------------------------------|------------|
| 72  | <i>Crotalus simus</i>               | [194]      |
| 73  | <i>Crotalus tigris</i>              | [210]      |
| 74  | <i>Crotalus viridis</i>             | [195]      |
| 75  | <i>Daboia russelii</i>              | [196–198]  |
| 76  | <i>Gloydus brevicauda</i>           | [199]      |
| 77  | <i>Gloydus intermedius</i>          | [200]      |
| 78  | <i>Lachesis acrochorda</i>          | [201]      |
| 79  | <i>Lachesis melanocephala</i>       | [201]      |
| 80  | <i>Lachesis muta</i>                | [211]      |
| 81  | <i>Lachesis stenophrys</i>          | [201]      |
| 82  | <i>Macrovipera lebetinus</i>        | [212]      |
| 83  | <i>Macrovipera mauritanica</i>      | [202]      |
| 84  | <i>Ovophis okinavensis</i>          | [203]      |
| 85  | <i>Porthidium lansbergii</i>        | [204]      |
| 86  | <i>Porthidium nasutum</i>           | [188]      |
| 87  | <i>Porthidium ophryomegas</i>       | [188]      |
| 88  | <i>Protobothrops flavoviridis</i>   | [203]      |
| 89  | <i>Protobothrops mucrosquamatus</i> | [205]      |
| 90  | <i>Sistrurus catenatus</i>          | [213]      |
| 91  | <i>Tropidolaemus wagleri</i>        | [206]      |
| 92  | <i>Vipera anatolica</i>             | [208]      |
| 93  | <i>Vipera nikolskii</i>             | [207]      |
| 94  | <i>Vipera orlovi</i>                | [207]      |
| 95  | <i>Vipera renardi</i>               | [207]      |

**Table S4.** List of snake species for which transcriptomics libraries are available.

| No.               | Snake                           | References  |
|-------------------|---------------------------------|-------------|
| <b>Colubridae</b> |                                 |             |
| 1                 | <i>Dispholidus typus</i>        | [5,224]     |
| 2                 | <i>Liophis miliaris</i>         | [224]       |
| 3                 | <i>Liophis poecilogyris</i>     | [5,224]     |
| 4                 | <i>Philodryas olfersii</i>      | [5,224,225] |
| 5                 | <i>Rhabdophis tigrinus</i>      | [5,224]     |
| 6                 | <i>Telescopus dhara</i>         | [5,224]     |
| 7                 | <i>Thamnodynastes strigatus</i> | [226]       |
| 8                 | <i>Thrasops jacksonii</i>       | [5]         |
| 9                 | <i>Trimorphodon biscutatus</i>  | [5,224]     |
| <b>Elapidae</b>   |                                 |             |
| 10                | <i>Austrelaps labialis</i>      | [136]       |
| 11                | <i>Bungarus flaviceps</i>       | [227]       |
| 12                | <i>Bungarus multicinctus</i>    | [228]       |
| 13                | <i>Demansia vestigiata</i>      | [229]       |
| 14                | <i>Drysdalia coronoides</i>     | [143]       |
| 15                | <i>Hydrophis curtus</i>         | [230]       |
| 16                | <i>Micropechis ikaheca</i>      | [231]       |
| 17                | <i>Micrurus altirostris</i>     | [147]       |
| 18                | <i>Micrurus corallinus</i>      | [147,232]   |
| 19                | <i>Micrurus fulvius</i>         | [148]       |
| 20                | <i>Micrurus mipartitus</i>      | [233]       |

| No.                 | Snake                           | References |
|---------------------|---------------------------------|------------|
| 21                  | <i>Naja atra</i>                | [228]      |
| 22                  | <i>Oxyuranus microlepidotus</i> | [5]        |
| <b>Homalopsidae</b> |                                 |            |
| 23                  | <i>Cerberus rynchops</i>        | [234]      |
| 24                  | <i>Enhydris polylepis</i>       | [224]      |
| <b>Viperidae</b>    |                                 |            |
| 25                  | <i>Agkistrodon piscivorus</i>   | [235]      |
| 26                  | <i>Atropoides mexicanus</i>     | [236]      |
| 27                  | <i>Atropoides picadoi</i>       | [236]      |
| 28                  | <i>Azemiops feae</i>            | [5,224]    |
| 29                  | <i>Bitis gabonica</i>           | [237]      |
| 30                  | <i>Bothriechis lateralis</i>    | [236]      |
| 31                  | <i>Bothriechis schlegelii</i>   | [236]      |
| 32                  | <i>Bothropoides pauloensis</i>  | [170]      |
| 33                  | <i>Bothrops alternatus</i>      | [238]      |
| 34                  | <i>Bothrops asper</i>           | [236]      |
| 35                  | <i>Bothrops atrox</i>           | [239]      |
| 36                  | <i>Bothrops insularis</i>       | [182,222]  |
| 37                  | <i>Bothrops jararaca</i>        | [240,241]  |
| 38                  | <i>Causus rhombeatus</i>        | [5]        |
| 39                  | <i>Cerrophidion godmani</i>     | [236]      |
| 40                  | <i>Crotalus adamanteus</i>      | [189,242]  |
| 41                  | <i>Crotalus durissus</i>        | [243,244]  |
| 42                  | <i>Crotalus horridus</i>        | [193]      |
| 43                  | <i>Crotalus simus</i>           | [236,245]  |
| 44                  | <i>Deinagkistrodon acutus</i>   | [246]      |
| 45                  | <i>Echis carinatus</i>          | [247]      |
| 46                  | <i>Echis coloratus</i>          | [247]      |
| 47                  | <i>Echis ocellatus</i>          | [248,249]  |
| 48                  | <i>Echis pyramidum</i>          | [247]      |
| 49                  | <i>Lachesis muta</i>            | [250]      |
| 50                  | <i>Sistrurus catenatus</i>      | [251]      |
| 51                  | <i>Vipera ammodytes</i>         | [252]      |

**Table S5.** List of promising antivenom molecules.

| No.                              | Antivenom molecules        | Toxins or enzymes      | Snake                                                  | References |
|----------------------------------|----------------------------|------------------------|--------------------------------------------------------|------------|
| <b>Monoclonal antibody (MA)</b>  |                            |                        |                                                        |            |
| 1                                | MA                         | toxin alpha            | <i>Naja nigricollis</i>                                | [259]      |
| 2                                | MA                         | metalloproteinase HR1a | <i>Protobothrops flavoviridi</i>                       | [260]      |
| 3                                | MA                         | dendrotoxins           | <i>Dendroaspis polylepis</i>                           | [261]      |
| 4                                | MA                         | crotoxin               | <i>Crotalus durissus terrificus</i>                    | [262]      |
| 5                                | MA                         | Phospholipases A2      | <i>Bothrops jararacussu</i>                            | [263]      |
| 6                                | MA                         | alpha-neurotoxin       | <i>Naja kaouthia</i>                                   | [264]      |
| 7                                | MA                         | unspecified            | <i>Bothrops jararacussu</i> , <i>Crotalus durissus</i> | [265]      |
| <b>Small molecule inhibitors</b> |                            |                        |                                                        |            |
| 8                                | vaespladib (LY315920)      | phospholipase A2       | <i>Micrurus fulvius</i> , <i>Vipera berus</i>          | [266]      |
| 9                                | LY333013                   | phospholipase A2       | <i>Oxyuranus scutellatus</i>                           | [267]      |
| 10                               | batimastat and mari-mastat | metalloproteinase      | <i>Echis ocellatus</i>                                 | [268]      |

| No.                       | Antivenom molecules                                         | Toxins or enzymes    | Snake                                                                                                             | References |
|---------------------------|-------------------------------------------------------------|----------------------|-------------------------------------------------------------------------------------------------------------------|------------|
| 11                        | varespladib                                                 | phospholipase A2     | <i>Deinagkistrodon acutus</i> , <i>Agkistrodon halys</i> ,<br><i>Bungarus multicinctus</i> , and <i>Naja atra</i> | [269]      |
| 12                        | batimastat                                                  | metalloproteinases   | <i>Bothrops asper</i>                                                                                             | [270]      |
| 13                        | thiosemicarbazones                                          | metalloproteinases   | <i>Bothrops pauloensis</i>                                                                                        | [271]      |
| <b>Nanoparticles</b>      |                                                             |                      |                                                                                                                   |            |
| 14                        | C60 fullerene                                               | unspecified          | <i>Crotalus oreganushelleri</i>                                                                                   | [272]      |
| <b>Antibody fragments</b> |                                                             |                      |                                                                                                                   |            |
| 15                        | llama single-domain antibodies VHHs (C2 and C20) and VHH-Fc | $\alpha$ -cobratoxin | <i>Naja kaouthia</i>                                                                                              | [273]      |
| 16                        | humanized-single domain antibodies VH/VHH                   | phospholipase A2     | <i>Naja kaouthia</i>                                                                                              | [274]      |
| 17                        | camelid Single-Domain Antibodies (VHHs)                     | crotoxin             | <i>Crotalus durissus terrificus</i>                                                                               | [275]      |
| 18                        | recombinant single chain antibody, scFv                     | metalloproteinase    | <i>Bothrops asper</i>                                                                                             | [276]      |
| 19                        | single-chain variable fragment (scFv)                       | unspecified          | <i>Agkistrodon acutus</i>                                                                                         | [277]      |
